# Supplementary material
Source: PubMed Central journal article supplement (PMC3711535)

Figure 1

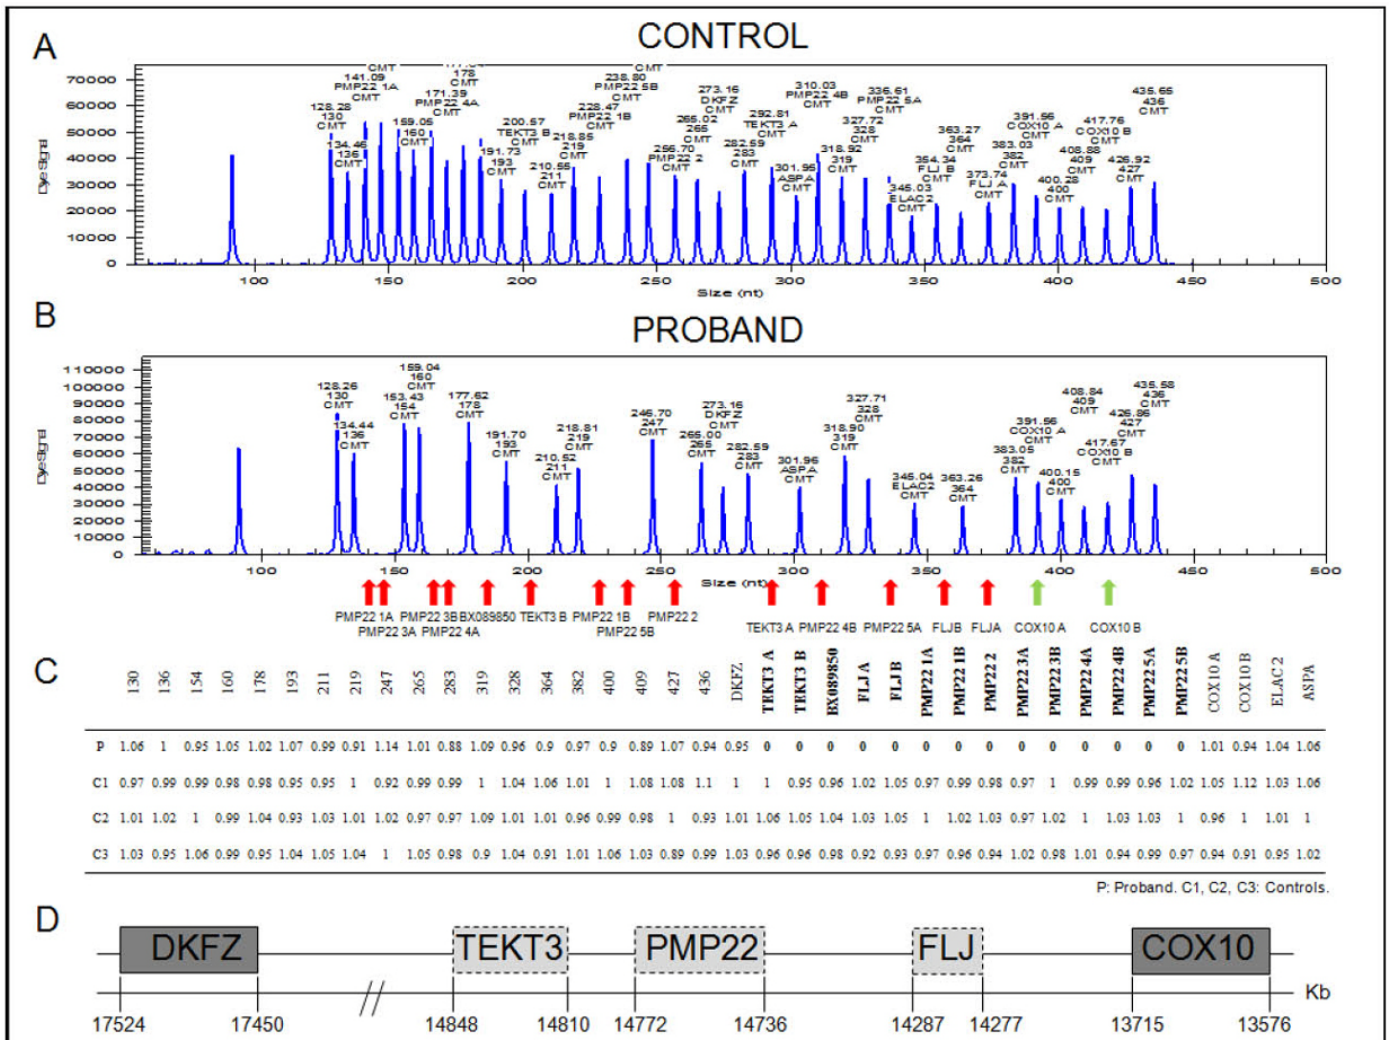

Figure 2

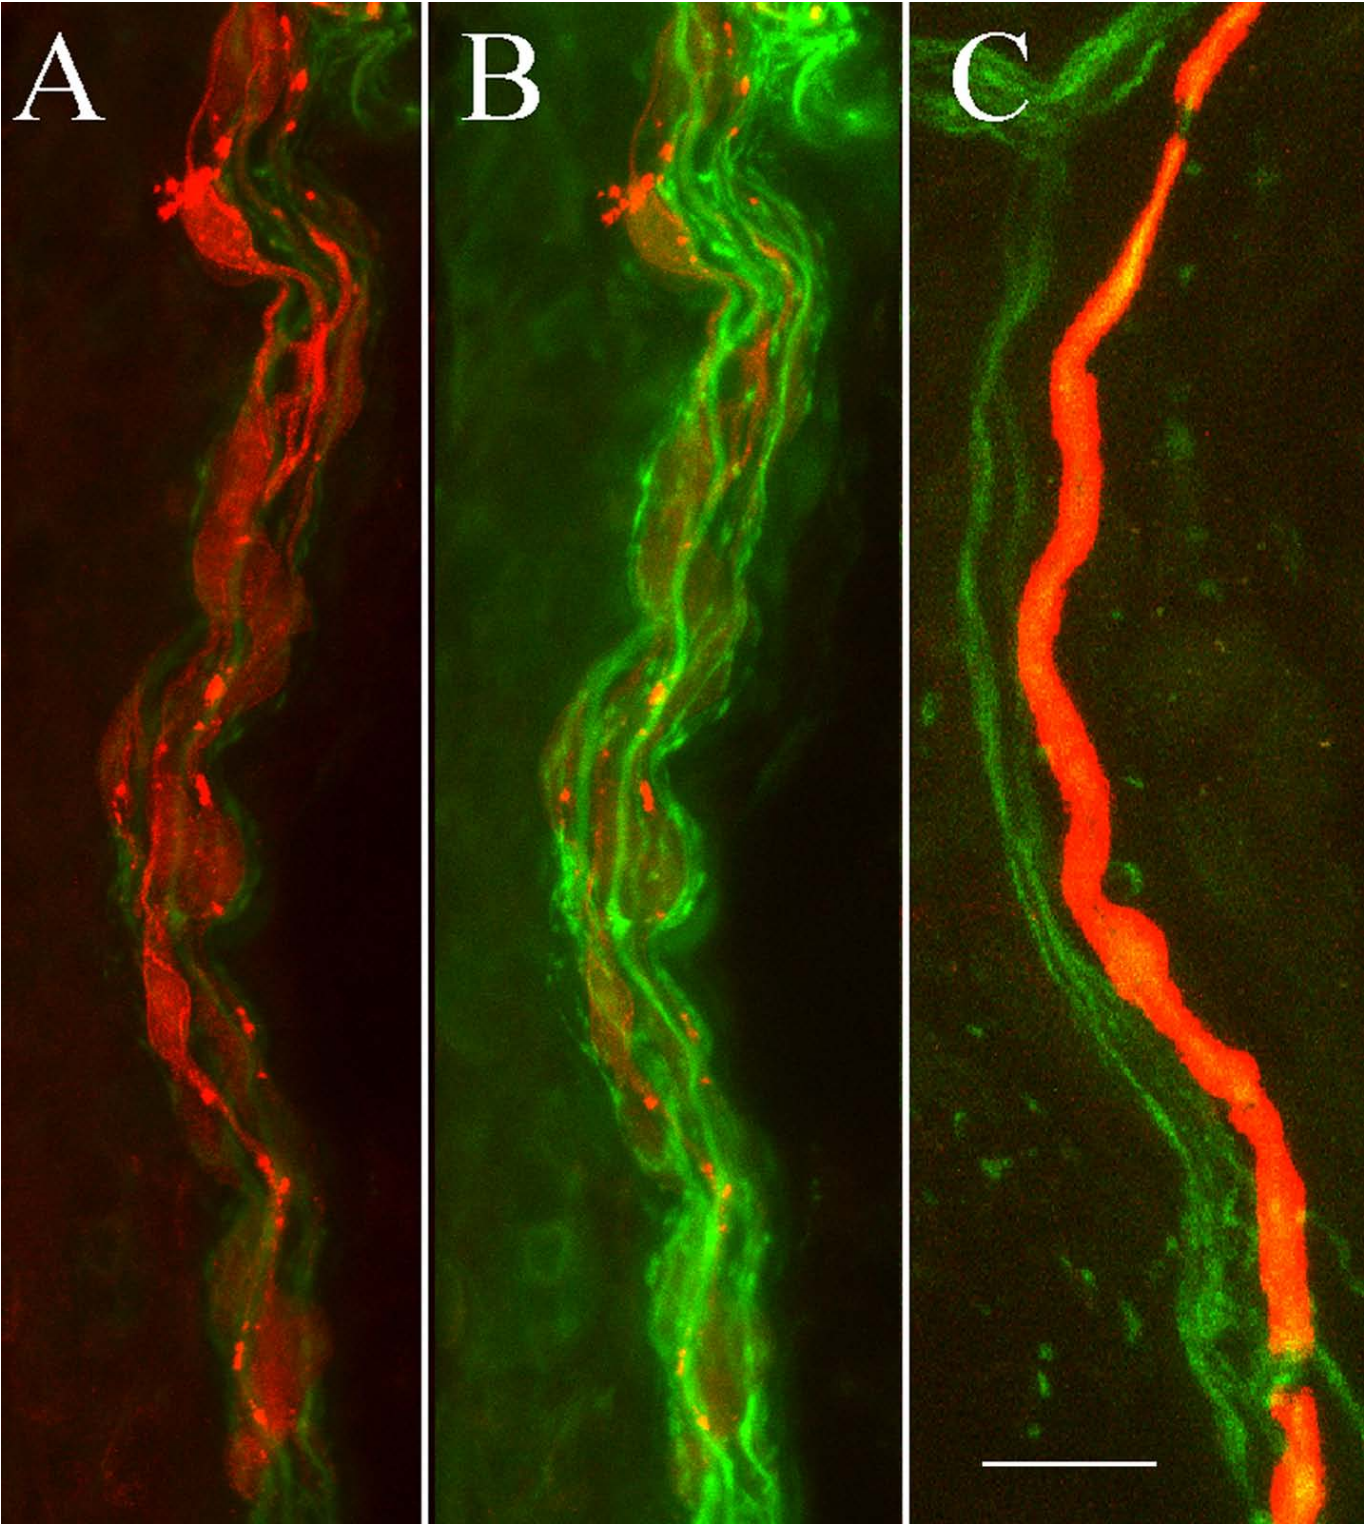

Figure 3

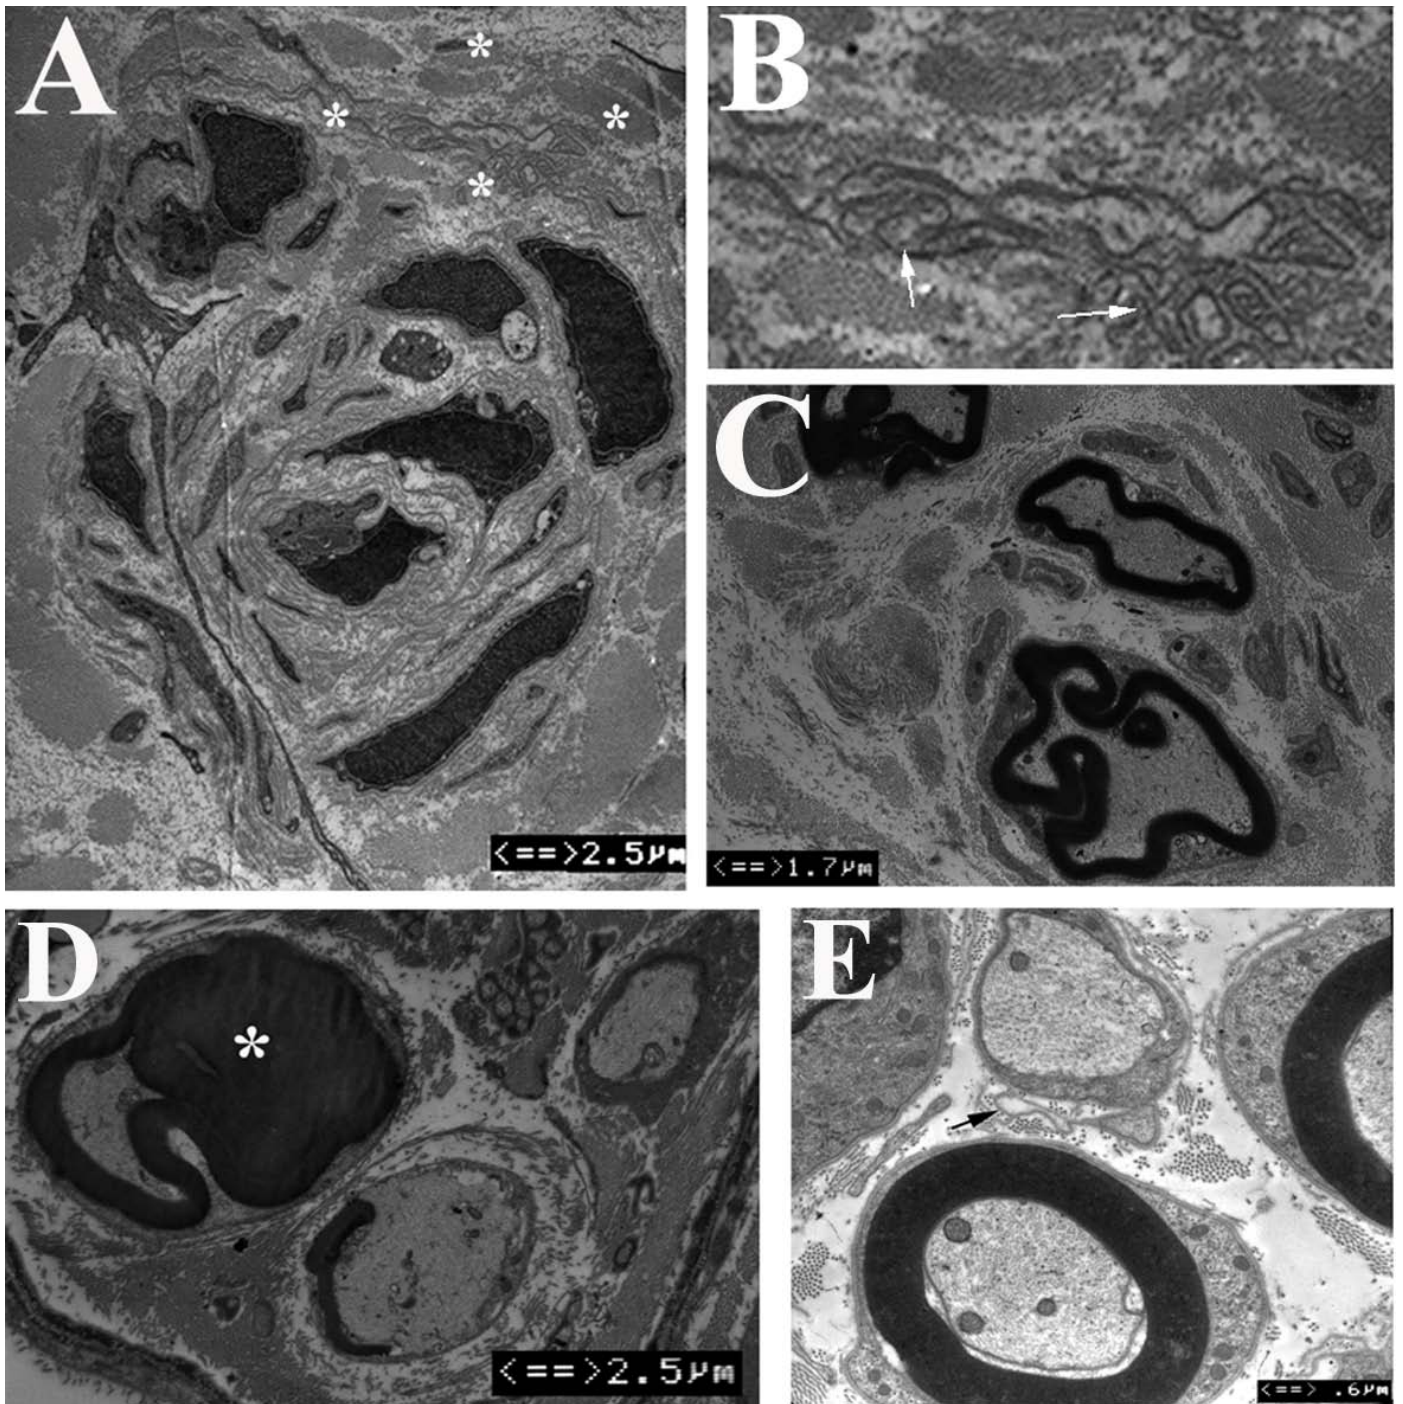

Figure 4

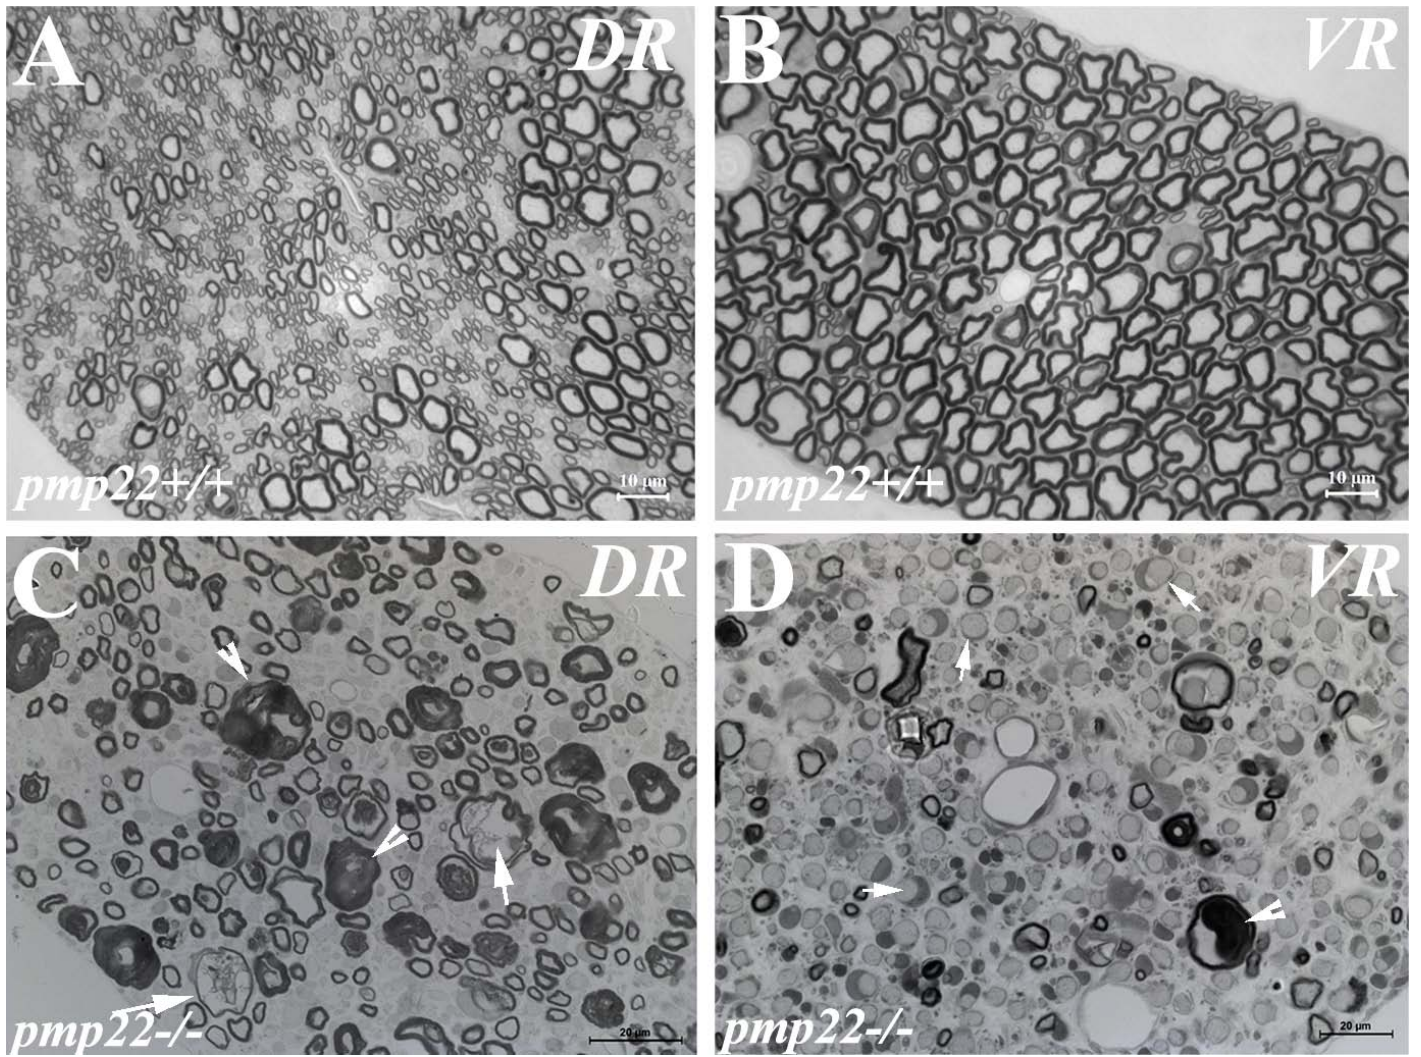

Supplementary Figure 1

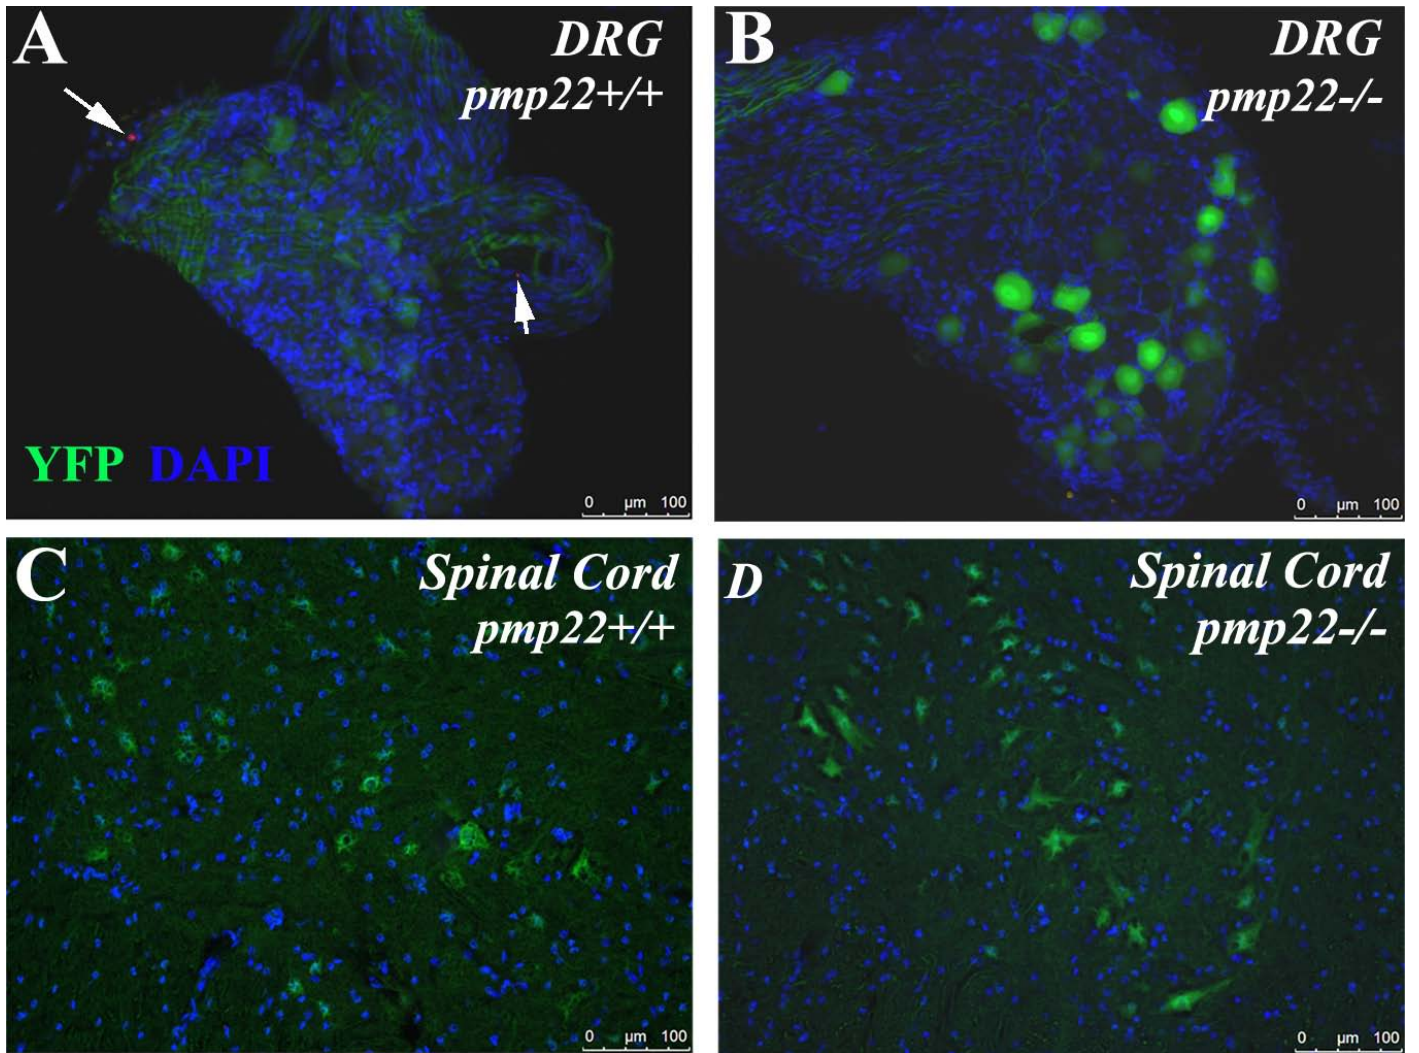

Supplementary Figure 2

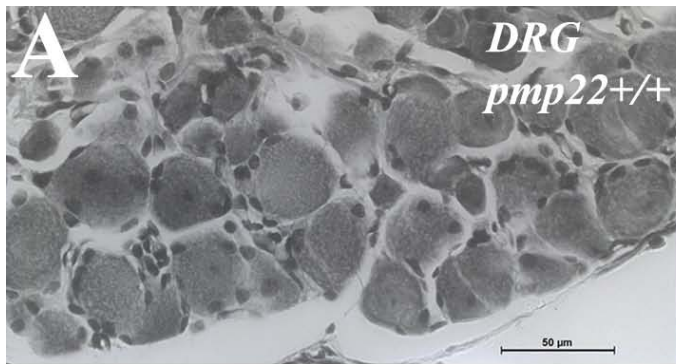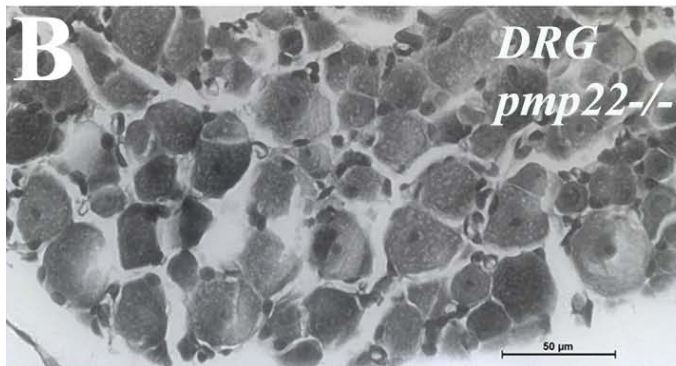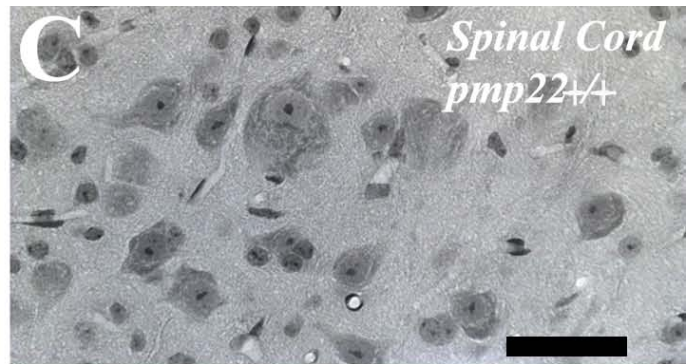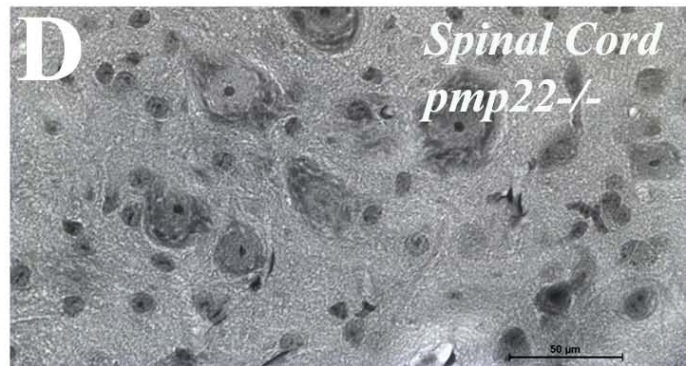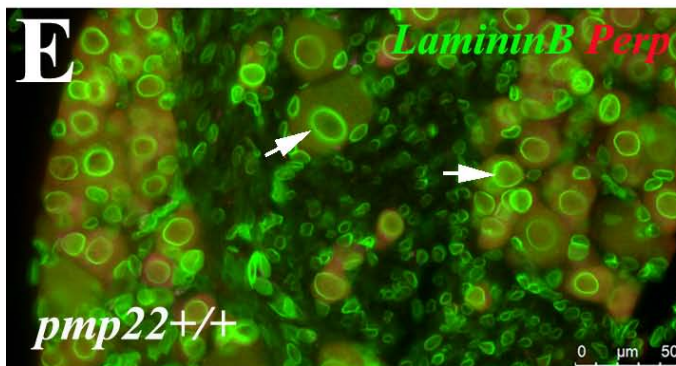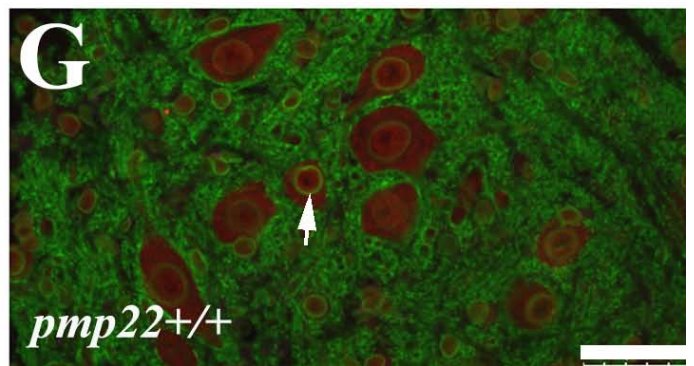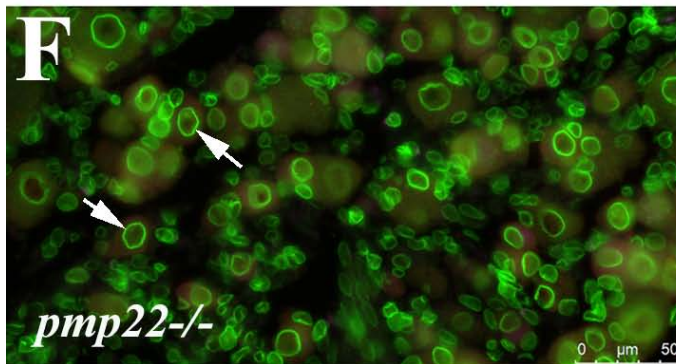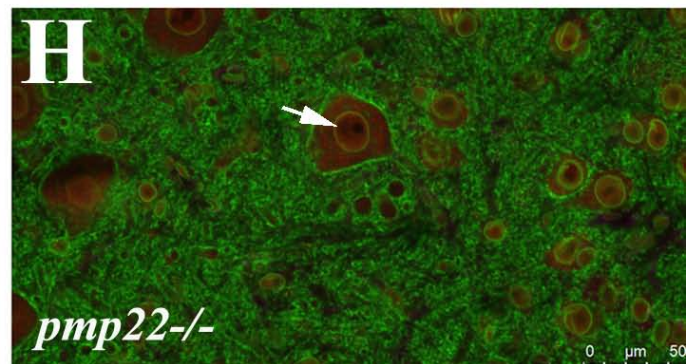

Supplement: NIHMS473693-supplement-All_Figures_with_labels.pdf [file NIHMS473693-supplement-All_Figures_with_labels.pdf]
